# Supplementary material
Source: PubMed Central journal article supplement (PMC3811009)
Supplement: NIHMS508598-supplement-eTable.pdf [file NIHMS508598-supplement-eTable.pdf]

## Supplementary Online Content

Isanaka S, Mugusi F, Hawkins C, Spiegelman D, Okuma J, Aboud S, Guerino C, Fawzi WW. Effect of high- vs standard-dose multivitamin supplementation at the initiation of HAART on HIV disease progression and mortality in Tanzania: a randomized controlled trial. *JAMA*. doi:10.1001/jama.2012.13083.

**eTable.** Cause of death among those receiving high-dose and standard-dose multivitamin supplementation

This supplementary material has been provided by the authors to give readers additional information about their work.

**eTable. Cause of death among those receiving high-dose and standard-dose multivitamin supplementation**

| Primary cause of death as determined by verbal autopsy | All patients                       |                                | Patients with BMI at baseline < 16 kg/m <sup>2</sup> |                               |
|--------------------------------------------------------|------------------------------------|--------------------------------|------------------------------------------------------|-------------------------------|
|                                                        | N <sup>1</sup>                     |                                | N <sup>1</sup>                                       |                               |
|                                                        | Standard-dose regimen<br>(n = 220) | High-dose regimen<br>(n = 233) | Standard-dose regimen<br>(n = 31)                    | High-dose regimen<br>(n = 44) |
| Pneumonia                                              | 30                                 | 35                             | 2                                                    | 5                             |
| <i>Pneumocystis jiroveci</i> pneumonia                 | 12                                 | 9                              | 0                                                    | 0                             |
| Pulmonary tuberculosis                                 | 10                                 | 14                             | 2                                                    | 2                             |
| Extrapulmonary tuberculosis                            | 2                                  | 2                              | 1                                                    | 0                             |
| CVA / stroke / intracranial hemorrhage                 | 1                                  | 1                              | 0                                                    | 0                             |
| Heart failure                                          | 1                                  | 2                              | 0                                                    | 0                             |
| Diabetes                                               | 1                                  | 0                              | 0                                                    | 0                             |
| Vomiting                                               | 12                                 | 18                             | 3                                                    | 2                             |
| Diarrhea                                               | 18                                 | 24                             | 7                                                    | 7                             |
| Acute watery diarrhea                                  | 2                                  | 2                              | 0                                                    | 1                             |
| Persistent diarrhea                                    | 2                                  | 2                              | 0                                                    | 0                             |
| Dysentery                                              | 1                                  | 0                              | 0                                                    | 0                             |
| Renal failure                                          | 1                                  | 2                              | 0                                                    | 0                             |
| Convulsions                                            | 1                                  | 1                              | 0                                                    | 0                             |
| Meningitis                                             | 12                                 | 7                              | 1                                                    | 2                             |
| Viral encephalitis                                     | 2                                  | 0                              | 0                                                    | 0                             |
| Severe headache                                        | 3                                  | 0                              | 0                                                    | 0                             |
| Suicide                                                | 0                                  | 1                              | 0                                                    | 1                             |
| Malaria                                                | 14                                 | 11                             | 2                                                    | 3                             |
| Septicemia                                             | 2                                  | 10                             | 0                                                    | 3                             |
| Fever                                                  | 9                                  | 6                              | 0                                                    | 1                             |
| Anemia                                                 | 10                                 | 7                              | 2                                                    | 1                             |
| Severe anemia with congestive heart failure            | 14                                 | 10                             | 5                                                    | 0                             |
| Kaposi's sarcoma                                       | 1                                  | 1                              | 0                                                    | 0                             |
| Wasting                                                | 0                                  | 0                              | 0                                                    | 0                             |
| Invasive cervical carcinoma                            | 0                                  | 0                              | 0                                                    | 0                             |
| HIV / AIDS with opportunistic infection                | 41                                 | 48                             | 6                                                    | 12                            |
| Suspected IRIS                                         | 1                                  | 0                              | 0                                                    | 0                             |
| Undetermined <sup>2</sup>                              | 34                                 | 29                             | 3                                                    | 4                             |
| Other                                                  | 3                                  | 7                              | 1                                                    | 2                             |

<sup>1</sup> Sum may not equal total due to multiple causes of death.

<sup>1</sup> Limited data to ascertain cause of death.
